# Supplementary material for: PD-1/PD-L1 blockade abrogates a dysfunctional innate-adaptive immune axis in critical β-coronavirus disease
Source: PubMed Central journal article supplement — Sci Adv. 2022 Sep 21;8(38):eabn6545. doi: 10.1126/sciadv.abn6545 (PMC9491709; doi:10.1126/sciadv.abn6545), 2022-09-21
Supplement: sciadv.abn6545_sm.pdf [file sciadv.abn6545_sm.pdf]

Supplementary Materials for  
**PD-1/PD-L1 blockade abrogates a dysfunctional innate-adaptive immune axis  
in critical  $\beta$ -coronavirus disease**

Maite Duhalde Vega *et al.*

Corresponding author: Mercedes Segovia, [msegovia@pasteur.edu.uy](mailto:msegovia@pasteur.edu.uy); Marcelo Hill, [mhill@pasteur.edu.uy](mailto:mhill@pasteur.edu.uy)

*Sci. Adv.* **8**, eabn6545 (2022)  
DOI: 10.1126/sciadv.abn6545

**This PDF file includes:**

Figs. S1 to S17  
Table S1

**Fig. S1**

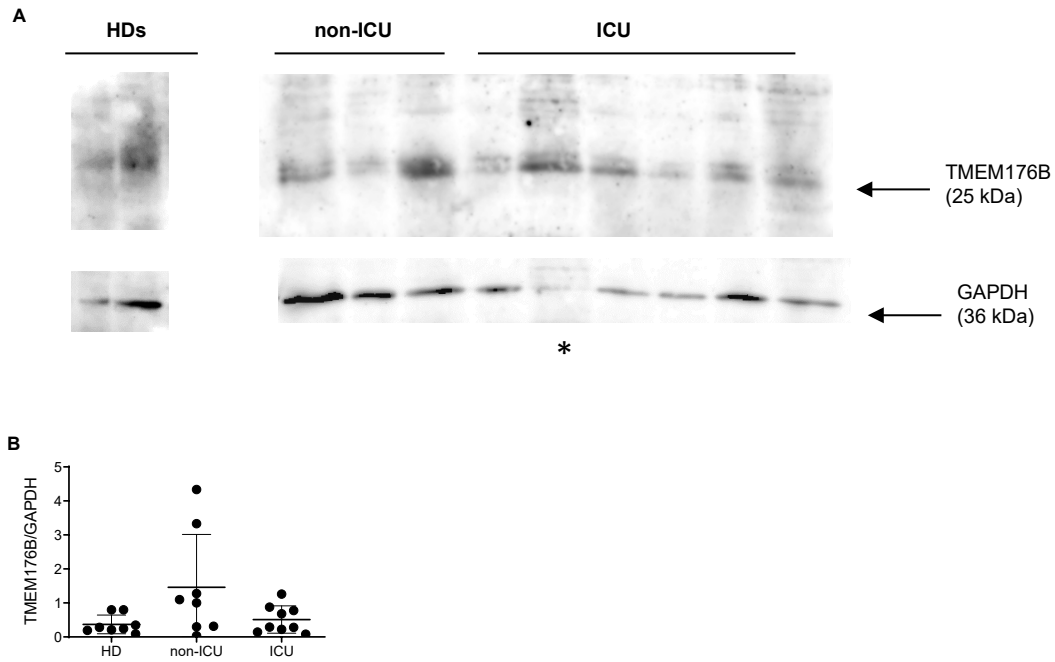

**Figure S1. Western blot study of TMEM176B/GAPDH ratios in peripheral blood CD14<sup>+</sup> monocytes from healthy donors (HDs), non-ICU and ICU patients.**

**(A)** Representative western blot. \* Sample not considered for the analysis due to low GAPDH.

**(B)** Graphic depicting all the studied patients.

## Fig. S2

A

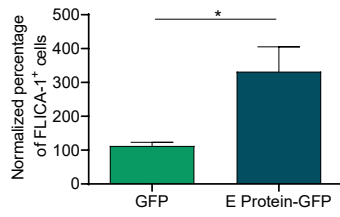

B

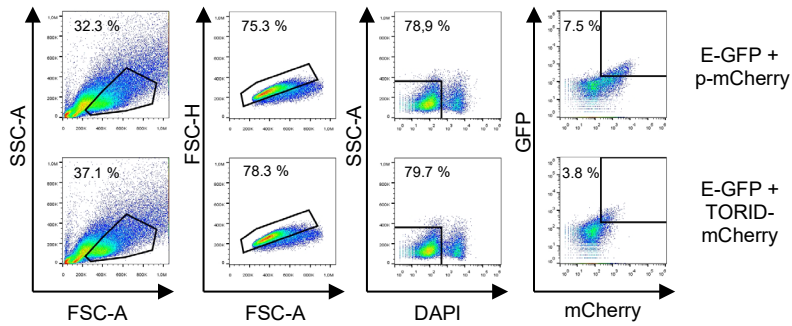

**Figure S2. Study on inflammasome activation in human THP-1 monocytes transfected with plasmids coding for GFP, E Protein-GFP, mcherry and TMEM176Bmcherry.**

(A) Study of FLICA-1<sup>+</sup> cells. A pool of two experiments is shown. \* p < 0.05. One sample *t* test.

(B) Gating strategy. One experiment representative of three is shown.

**Fig. S3**

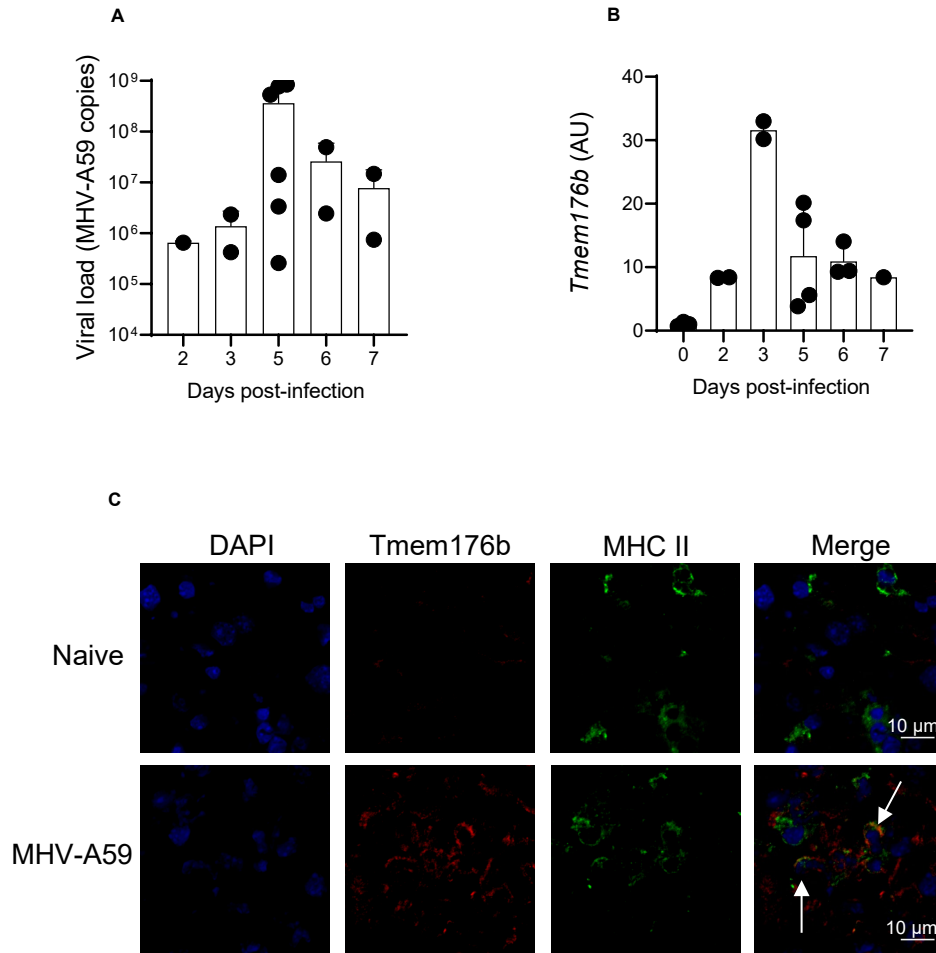

**Figure S3. Viral load and *Tmem176b* expression in the liver of MHV-A59-infected mice.**  
(A) Viral load was analyzed by RT-qPCR in the liver of WT mice at different days post-infection.  
(B) *Tmem176b* expression was studied by RT-qPCR in the liver of WT mice at different days post-infection.  
(C) Mouse liver cryosections from MHV-A59-infected or naive animals were stained with anti MHC class II and TMEM176B antibodies, then the nucleus was stained with DAPI and analyzed by confocal microscopy. Animals were sacrificed at 5 dpi. The arrows show MHC class II+ *Tmem176b*+ cells. Images are representative of 4 naive and 4 infected animals.

**Fig. S4**

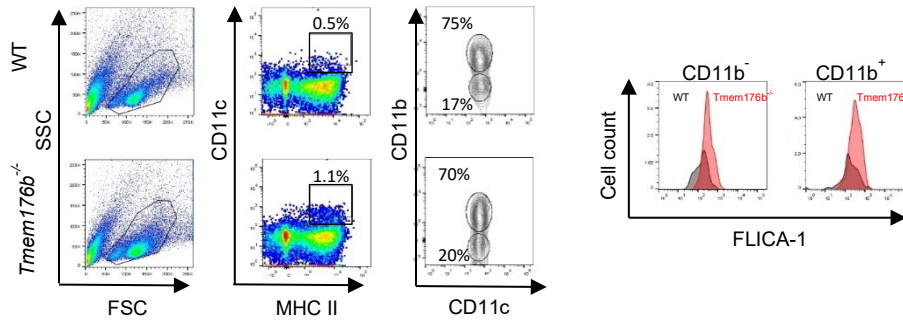

**Figure S4. Gating strategy to study conventional DCs infiltrating the liver of WT and *Tmem176b*<sup>-/-</sup> mice.**

Analysis of FLICA-1 staining shown in Fig. 1 K-L was done in CD11b<sup>-</sup> and CD11b<sup>+</sup> conventional DCs as defined here. One experiment representative of three is shown.

**Fig. S5**

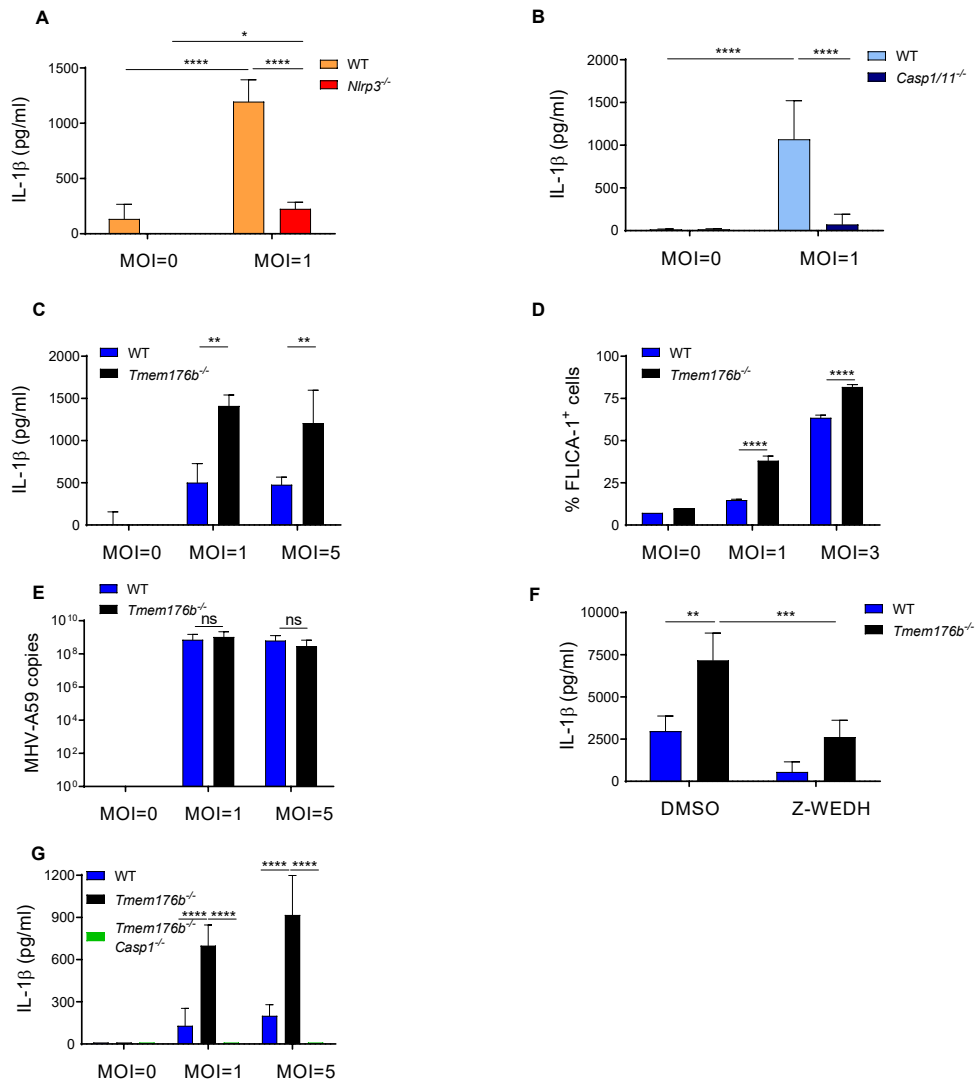

**Figure S5. *Tmem176b* controls MHV-A59-triggered NLRP3 inflammasomes in bone marrow-derived dendritic cells (BMDCs)**

(A) WT and *Nlrp3*<sup>-/-</sup> BMDCs were left untreated or infected with MHV-A59. IL-1β was assessed by ELISA in the culture supernatant. One experiment representative of three is shown. \* p<0.05; \*\*\*\* p<0.0001. Two-way ANOVA test.

(B) WT and *Casp1/11*<sup>-/-</sup> BMDCs (both in C57BL/6JN background) were infected with MHV-A59 and IL-1β was assessed by ELISA in the culture supernatant. One experiment representative of three is shown. \*\*\*\* p<0.0001. Two-way ANOVA test.

(C) WT (issued from littermate controls) and *Tmem176b*<sup>-/-</sup> BMDCs were infected with MHV-A59 at the indicated multiplicities of infection (MOIs). IL-1β was assessed by ELISA in the culture supernatant. One experiment representative of four is shown. \*\* p<0.01. Two-way ANOVA test.

(D) Caspase-1 activity was studied by staining WT and *Tmem176b*<sup>-/-</sup> BMDCs with FLICA-1 followed by flow cytometry analysis. One experiment representative of three is shown. \*\*\*\* p<0.0001. Two-way ANOVA test.

(E) WT and *Tmem176b*<sup>-/-</sup> BMDCs were infected with MHV-A59 at the indicated MOIs. MHV-A59 copies were assessed by RT-qPCR. A pool of two experiments is shown. ns: not significant. Two-way ANOVA test.

(F) WT and *Tmem176b*<sup>-/-</sup> BMDCs were infected with MHV-A59 in the presence of DMSO (vehicle control) or the Caspase-1 inhibitor Z-WEDH. IL-1β was assessed by ELISA in the culture supernatant. One experiment representative of three is shown. \*\* p<0.01; \*\*\* p<0.001. Two-way ANOVA test.

(G) WT, *Tmem176b*<sup>-/-</sup> and *Tmem176b*<sup>-/-</sup> *Casp1*<sup>-/-</sup> BMDCs were infected with MHV-A59 at the indicated MOIs. IL-1β was assessed by ELISA in the culture supernatant. One experiment representative of three is shown. \*\*\*\* p<0.0001. Two-way ANOVA test.

**Fig. S6**

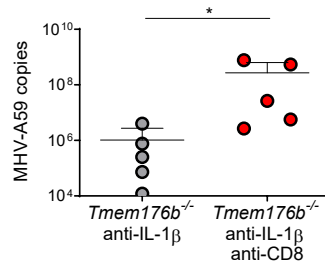

**Figure S6. Depletion of the CD8 compartment increases viral load in *Tmem176b*<sup>-/-</sup> mice treated with anti-IL-1β antibodies.**

*Tmem176b*<sup>-/-</sup> mice were infected with MHV-A59 at day 0 through i.p. injection. One µg anti-IL-1β was injected i.p every 5 days since day -2. One hundred µg anti-CD8 antibody was injected i.p every 3 days since day -2. Viral load was assessed by RT-PCR in livers at 5 dpi. Mann-Whitney test. \* p < 0.05.

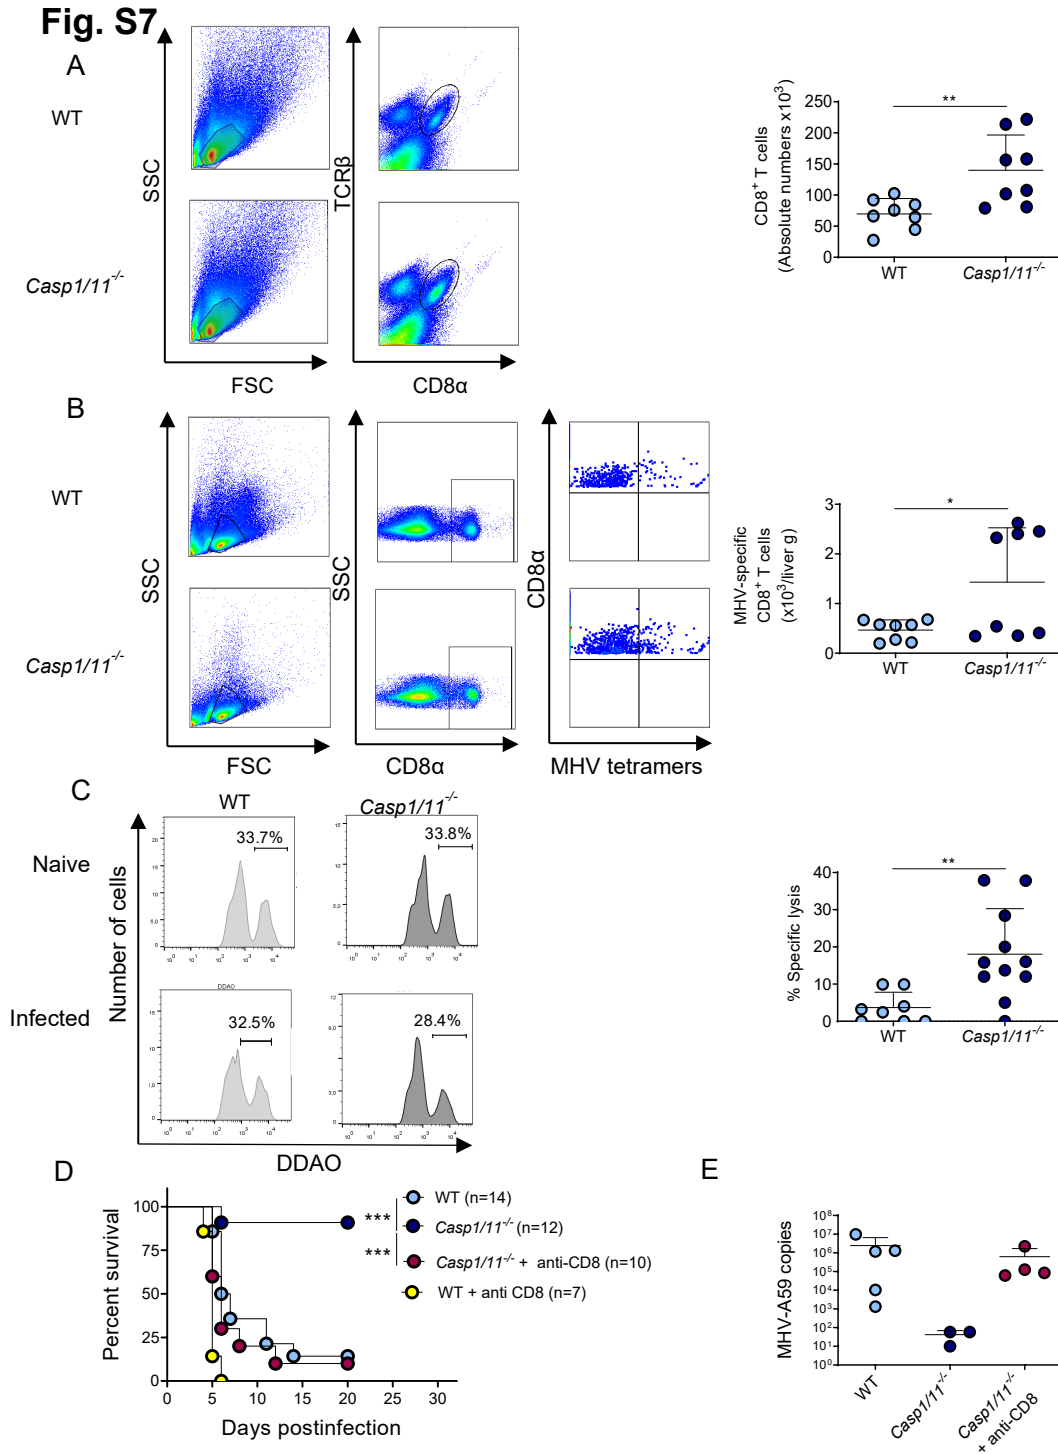

**Figure S7. *Casp1/11* deficiency is associated with reinforced CD8<sup>+</sup> T cell responses and improved outcome of MHV-A59 infection.**

(A) WT and *Casp1/11*<sup>-/-</sup> mice were infected with MHV-A59 (1200 PFU). Total CD8<sup>+</sup> T cells were studied by flow cytometry in the spleen. The left panel shows representative dot plots whereas the right graphic shows the absolute number of CD8<sup>+</sup> T cells for 8 WT and 8 *Casp1/11*<sup>-/-</sup> mice. \*\*  $p < 0.01$ . Student's *t* test.

(B) MHV-specific CD8<sup>+</sup> T cells in the spleen were studied in the animals used in A. \*  $p < 0.05$ . Student's *t* test.

(C) *In vivo* MHV-sp cytotoxic (CTL) activity assay was performed on 8 WT and 11 *Casp1/11*<sup>-/-</sup> infected mice at 5 dpi. Representative histograms are shown in the left panel. The percentage of specific lysis was calculated with the formula showed in the materials and methods section. \*\*  $p < 0.01$ . Student's *t* test.

(D) Mouse survival was studied in MHV-A59-infected WT (C57BL/6JN) and *Casp1/11*<sup>-/-</sup> animals treated with depleting anti-CD8 antibody. One hundred  $\mu$ g anti-CD8 antibody was injected i.p every 3 days since day -2. CD8 depletion was confirmed by flow cytometry. \*\*\*  $p < 0,001$ . Log-rank (Mantel-Cox) test.

(E) Viral load was analyzed by RT-qPCR in the liver of 5 WT and 3 *Casp1/11*<sup>-/-</sup> as well as 4 *Casp1/11*<sup>-/-</sup> animals treated with depleting anti-CD8 antibody. ns One-way ANOVA test.



**Fig. S8**

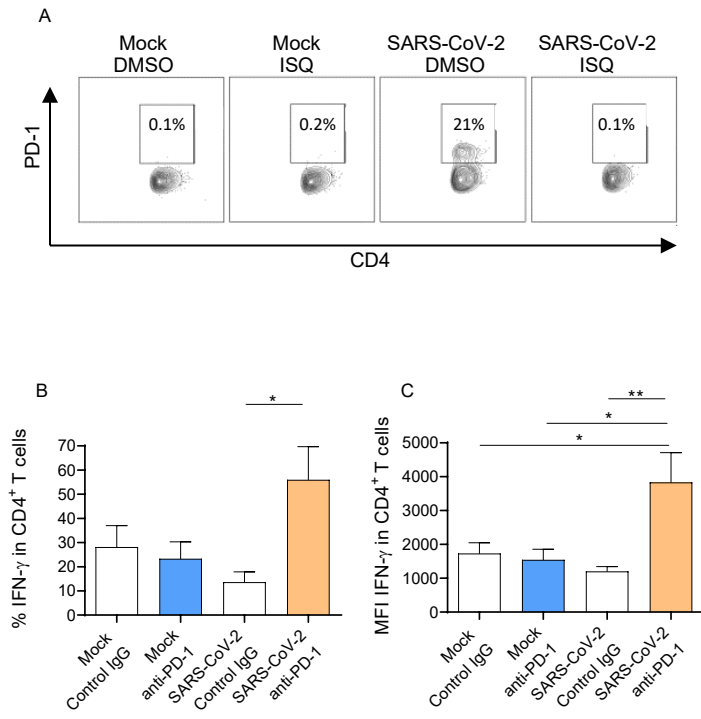

**Figure S8. Impact of cell culture media from infected monocytes on the functionality of alloreactive CD4<sup>+</sup> T cells**

**(A)** Study of PD-1 expression by CD4<sup>+</sup> TCR- $\beta$ <sup>+</sup> cells co-cultured with allogeneic monocytes  $\pm$  cell culture media (CCM) from SARS-CoV-2-infected monocytes  $\pm$  5 $\mu$ M ISQ. One experiment representative of three is shown.

**(B-C)** Flow cytometry study of IFN- $\gamma$  expression by CD4<sup>+</sup> T cells co-cultured with allogeneic monocytes  $\pm$  CCM from uninfected monocytes (Mock) or SARS-CoV-2-infected cells  $\pm$  anti-PD-1 or control antibody (20  $\mu$ g/ml). The percentage of IFN- $\gamma$ <sup>+</sup> cells is shown in B and the mean fluorescence intensity (MFI) of positive cells in C. The graphics show one experiment representative of three. \*  $p < 0.05$ ; \*\*  $p < 0.01$ . One-way ANOVA test.

**Fig. S9**

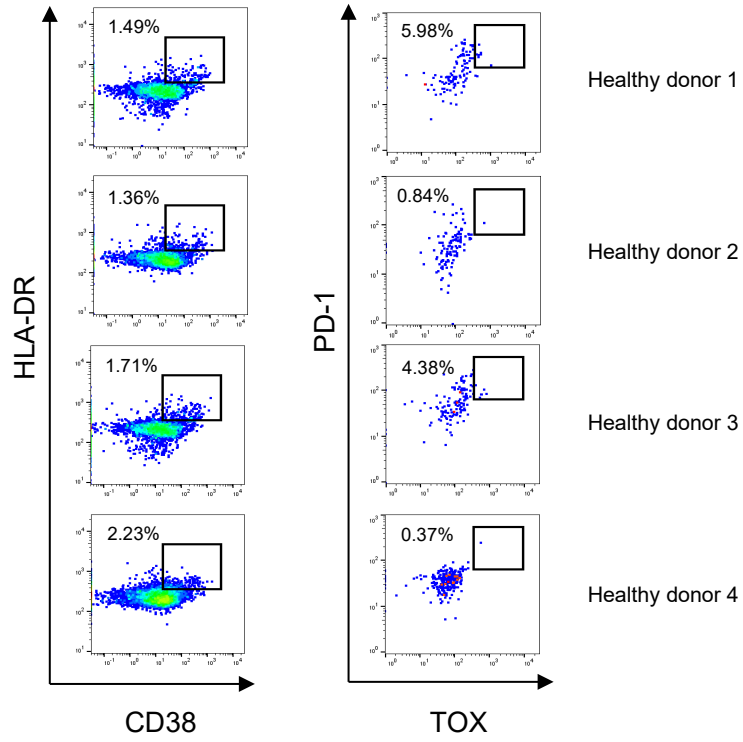

**Figure S9. Flow cytometry study of HLA-DR/CD38 within peripheral blood CD8<sup>+</sup> T cells and TOX/PD-1 within HLA-DR<sup>+</sup> CD38<sup>+</sup> CD8<sup>+</sup> T cells from healthy donors.**

**Fig. S10**

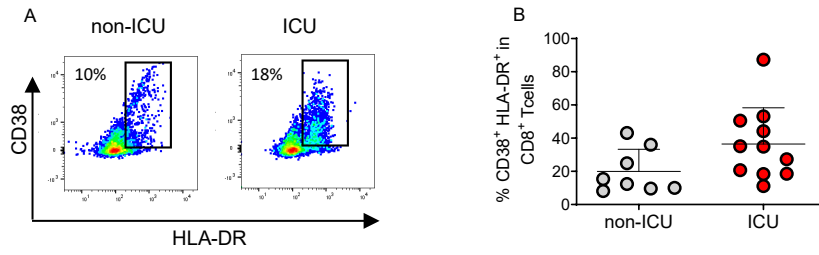

**Figure S10. Flow cytometry study of HLA-DR/CD38 in CD8<sup>+</sup> T cells from non-UCI and UCI patients.**

**(A)** Representative dot plots.

**(B)** The graphic shows the individual percentages of CD38<sup>+</sup> HLA-DR<sup>+</sup> cells within CD8<sup>+</sup> TCR- $\beta$ <sup>+</sup> for each studied patient.  $p=0.07$ . Student's  $t$  test.

**Fig. S11**

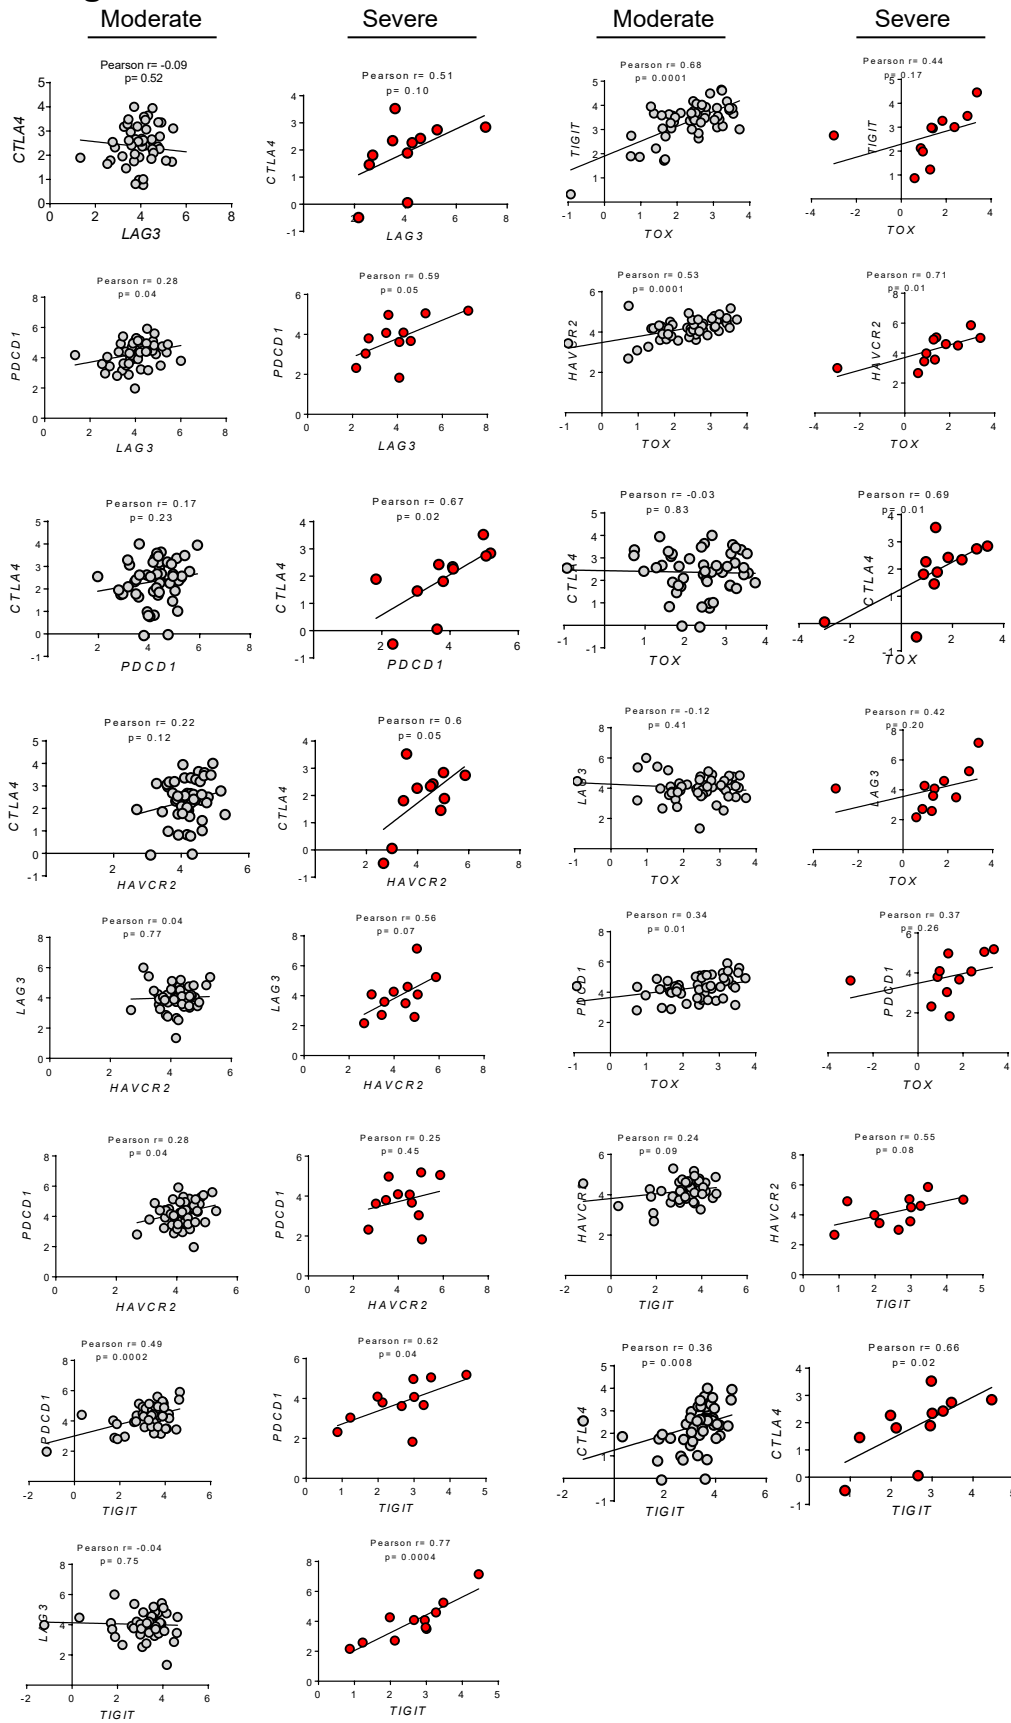

**Figure S11. Correlation of the indicated genes in moderate and severe COVID-19 patients from McClain et al. (46).**

**Fig. S12**

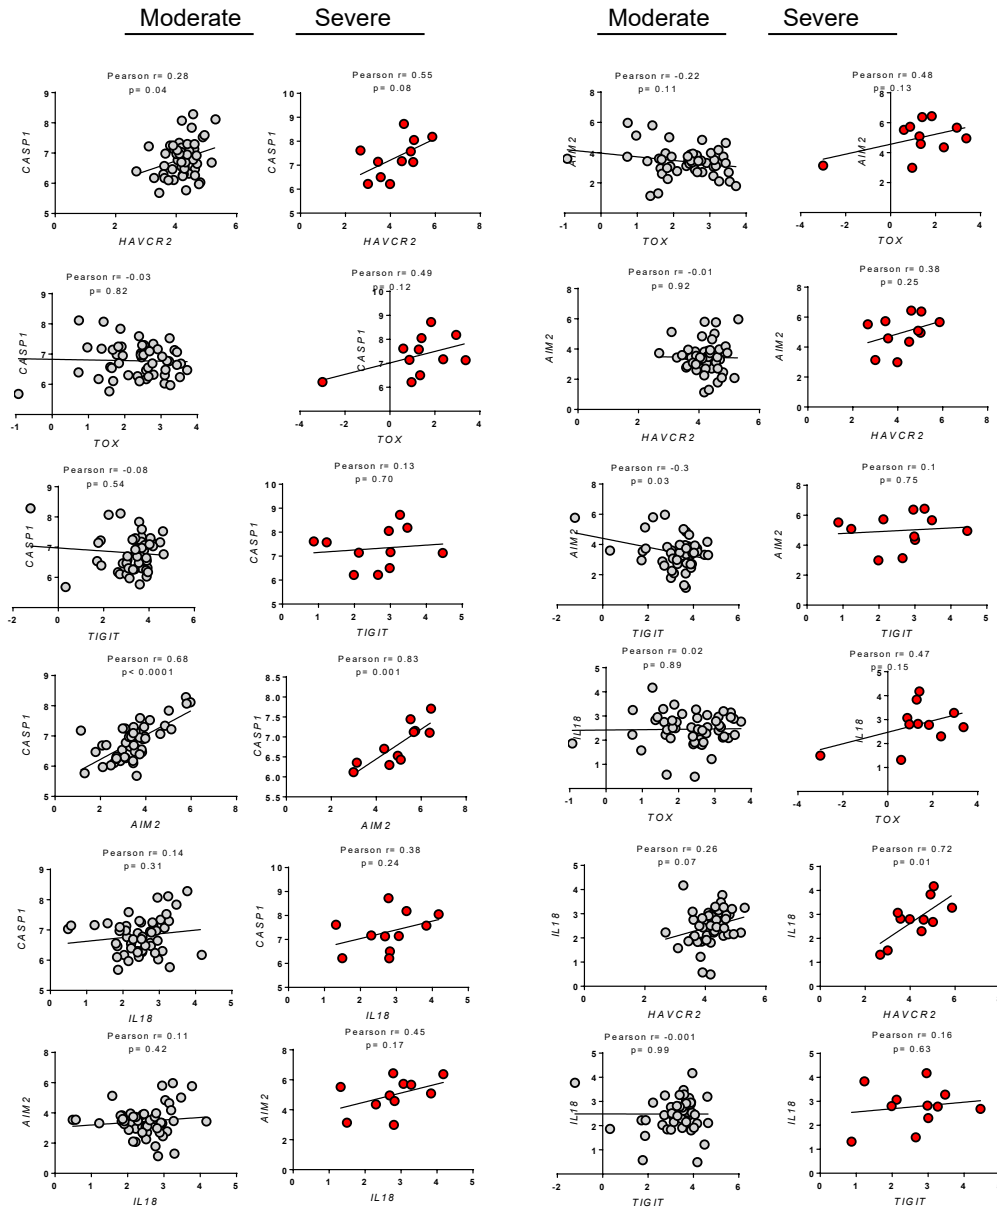

**Figure S12. Correlation of the indicated genes in moderate and severe COVID-19 patients from McClain et al. (46).**

**Fig. S13**

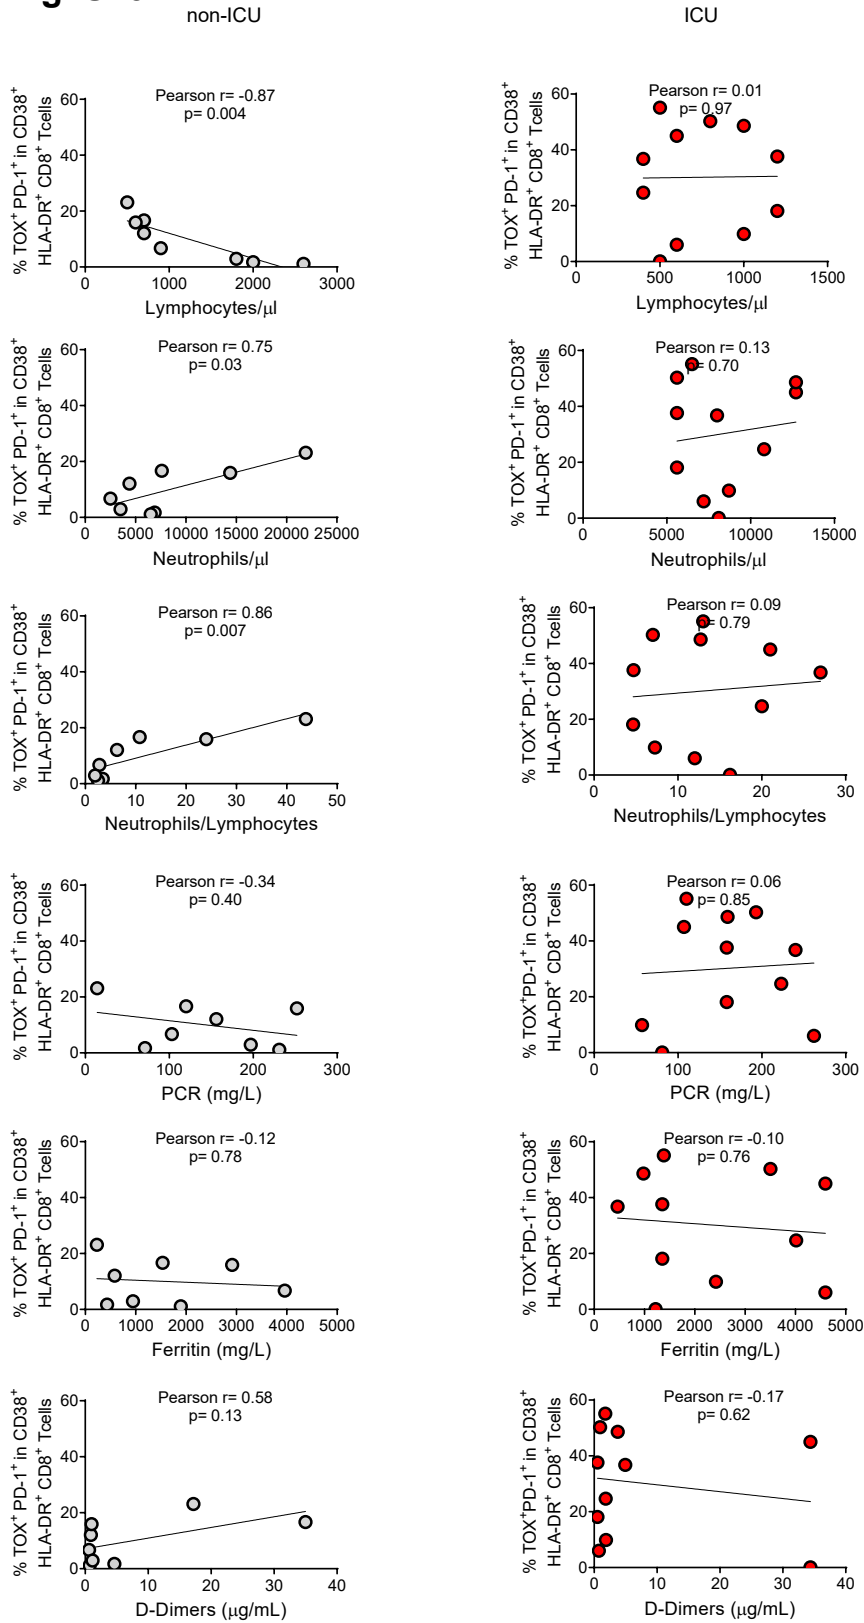

**Figure S13. Correlation of the indicated parameters in non-ICU and ICU patients.**

**Fig. S14**

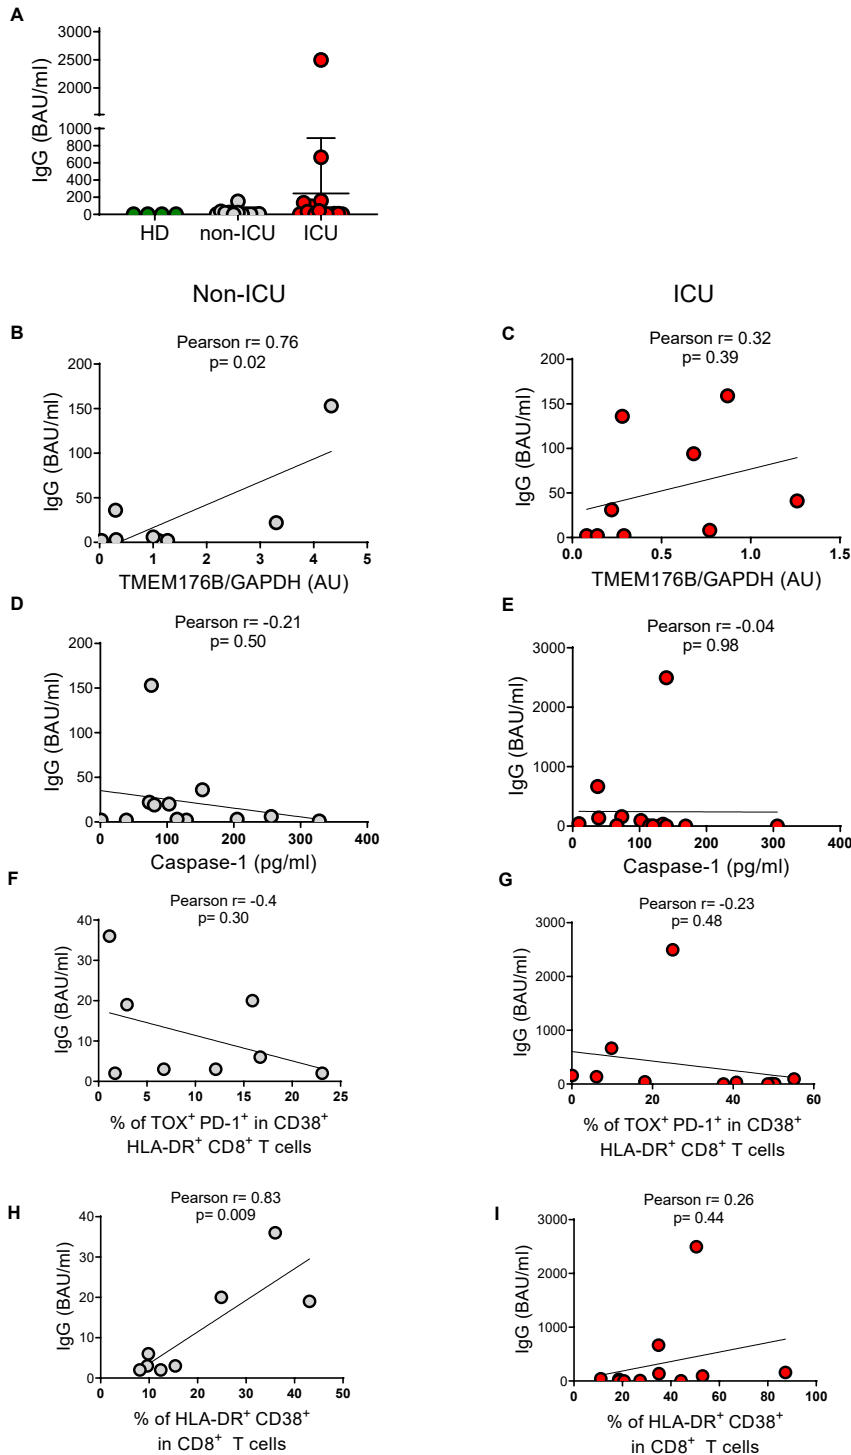

**Figure S14. Correlation of anti-SARS-CoV-2 spike IgG with the indicated parameters.**

Plasmatic anti-SARS-CoV-2 spike IgG were measured by ELISA.

**(A)** Anti-SARS-CoV-2 spike IgG levels in healthy donors (HDs), non-ICU and ICU patients.

**(B, D, F and H)** non-ICU patients.

**(C, E, G and I)** ICU patients.

**(B-C)** TMEM176B/GAPDH ratio was determined by western blot in samples peripheral blood CD14<sup>+</sup> monocytes and expressed in arbitrary units (AU).

**(D-E)** Active Caspase-1 was assessed by ELISA in plasma

**(F-G)** TOX<sup>+</sup> PD-1<sup>+</sup> in HLA-DR<sup>+</sup> CD38<sup>+</sup> CD8<sup>+</sup> T cells from peripheral blood were studied by flow cytometry.

**(H-I)** HLA-DR<sup>+</sup> CD38<sup>+</sup> CD8<sup>+</sup> T cells from peripheral blood were studied by flow cytometry.

**Fig. S15**

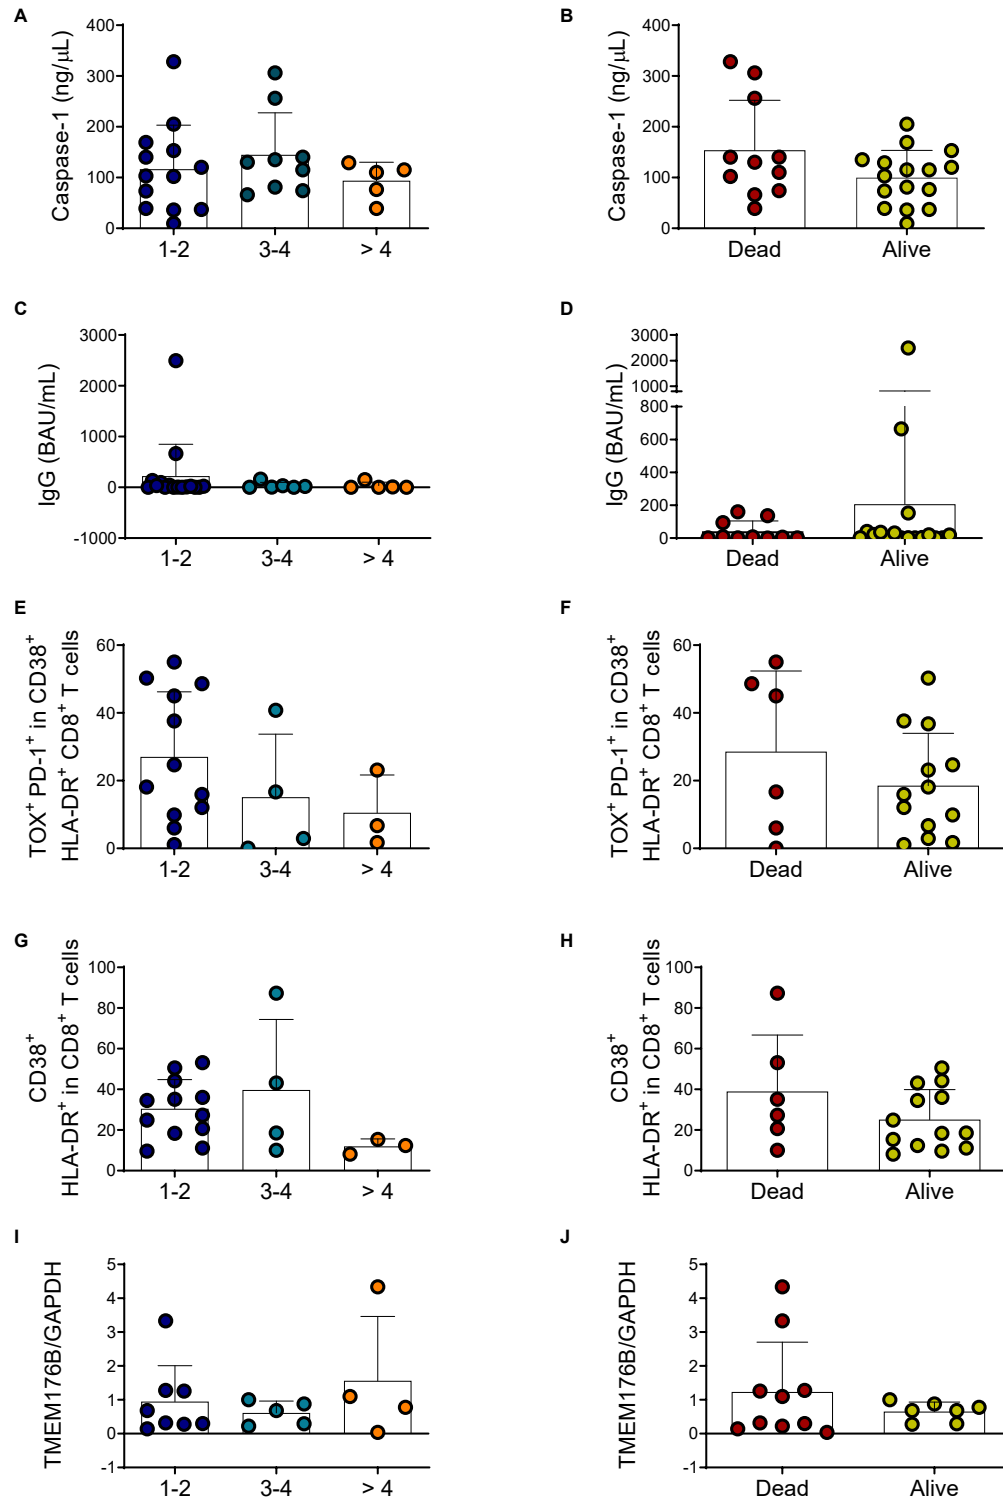

**Figure S15. Study of Charlson comorbidity index (A, C, E, G and I) and mortality (B, D, F, H and J) versus the indicated parameters.**

(A-B) Active Caspase-1 was assessed by ELISA in plasma

(C-D) Anti-SARS-CoV-2 spike IgG was determined by ELISA in plasma.

(E-F) TOX<sup>+</sup> PD-1<sup>+</sup> in HLA-DR<sup>+</sup> CD38<sup>+</sup> CD8<sup>+</sup> T cells from peripheral blood were studied by flow cytometry.

(G-H) HLA-DR<sup>+</sup> CD38<sup>+</sup> CD8<sup>+</sup> T cells from peripheral blood were studied by flow cytometry.

(I-J) TMEM176B/GAPDH ratio was determined by western blot in samples peripheral blood CD14<sup>+</sup> monocytes and expressed in arbitrary units (AU).



**Fig. S16**

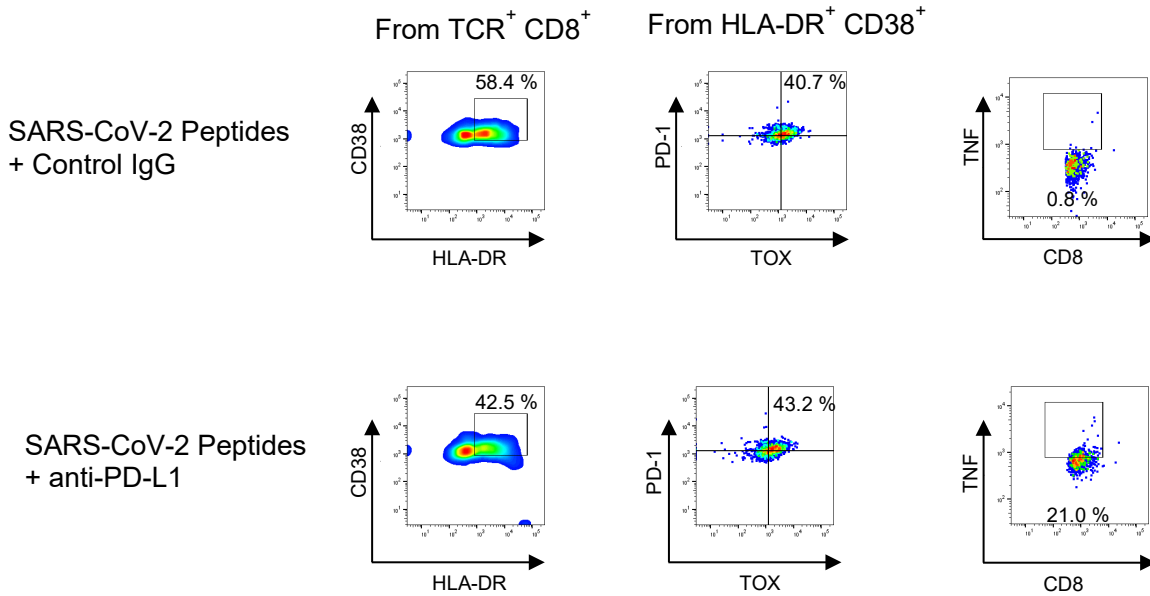

**Figure S16. PD-L1 blockade triggers TNF production by CD38<sup>+</sup> HLA-DR<sup>+</sup> PD-1<sup>+</sup> TOX<sup>+</sup> CD8<sup>+</sup> T cells treated with SARS-CoV-2 peptides.**

PBMCs from three lymphopenic critical patients were studied. Cells were incubated for 24 h with 20 µg/ml control IgG (human IgG1) or anti-PD-L1 antibody. Then, 6 nmol SARS-CoV-2 peptides were added to the culture for 6 h. Representative dot plots are shown.

**Fig. S17**

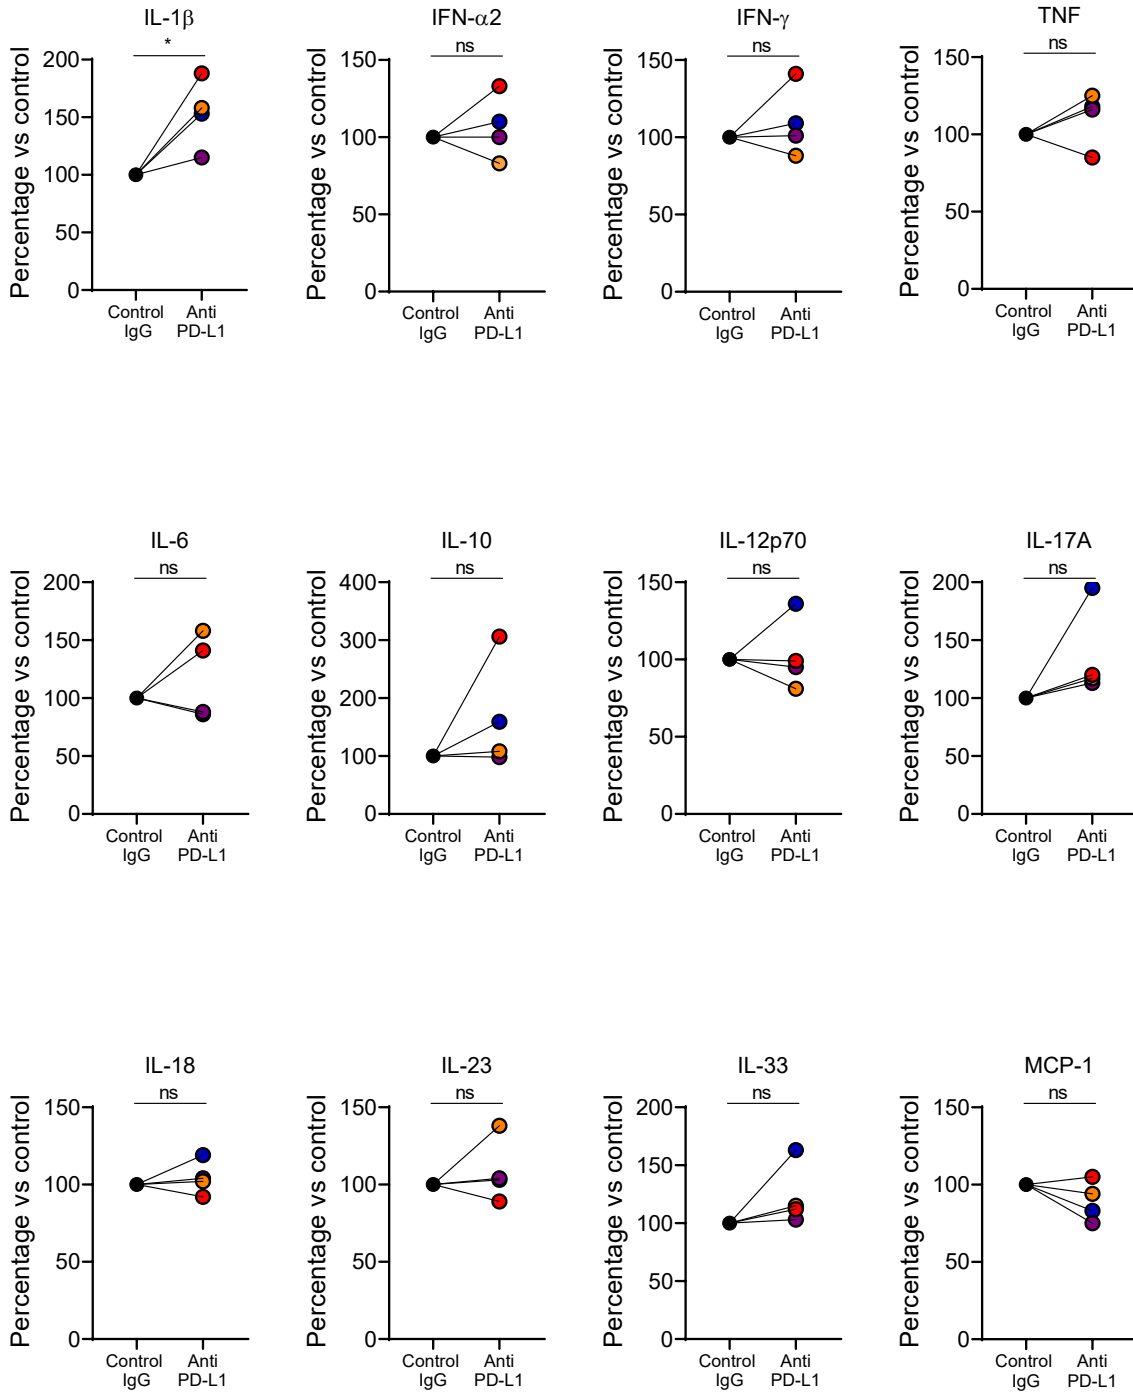

**Figure S17. Study of cytokines secreted in the culture supernatant of PBMCs from ICU patients.**

Supernatants of PBMCs cultures used in Figure 4G-H were assessed for an array of 12 cytokines. Cells were incubated for 24 h with 20  $\mu$ g/ml control IgG (human IgG1) or anti-PD-L1 antibody. Then, 6 nmol SARS-CoV-2 peptides were added to the culture for 6 h. Cytokines were quantified by flow cytometry using a bead-based multiplex kit. Absolute values were standardized in relationship to the control condition (100%). One sample *t* test. ns= not significant; \* *p* < 0.05.

| <b>Characteristic</b>                       |                         |
|---------------------------------------------|-------------------------|
| No.                                         | 30                      |
| Age, median (IQR), years                    | 65.5 (53.0 – 76.0)      |
| Male                                        | 22/30 (73.3 %)          |
| Female                                      | 8/30 (26.7 %)           |
| Length of hospital stay, median (IQR), days | 18 (10 – 33)            |
| WHO-CPS score, median (IQR)                 | 8 (5 – 10)              |
| Charlson co-morbidity index, median (IQR)   | 2 (1 – 3)               |
| ICU                                         | 19/30 (63.3 %)          |
| non-ICU                                     | 11/30 (36.7 %)          |
| Temperature, median (IQR), °C               | 37.8 (37.0 – 38.0)      |
| Respiratory rate, median (IQR), bpm         | 25.5 (24.0 – 28.0)      |
| SpO <sub>2</sub> , median (IQR), %          | 88.0 (86.0 – 89.0)      |
| <b>Co-existing conditions</b>               | 10/30 (33.3 %)          |
| Dementia                                    | 3/30 (10.0 %)           |
| Diabetes mellitus                           | 3/30 (10.0 %)           |
| Chronic obstructive pulmonary disease       | 3/30 (10.0 %)           |
| Congestive heart failure                    | 1/30 (3.3 %)            |
| Connective tissue diseases                  | 1/30 (3.3 %)            |
| Ischemic cardiomyopathy                     | 1/30 (3.3 %)            |
| <b>Smoking</b>                              |                         |
| No                                          | 26/30 (86.7 %)          |
| Current                                     | 1/30 (3.3 %)            |
| Former                                      | 3/30 (10.0 %)           |
| <b>Laboratory values, median (IQR)</b>      |                         |
| CRP, mg/L                                   | 158.0 (107.8 – 196.0)   |
| D-Dimer, µg/mL                              | 1.8 (0.7 – 4.2)         |
| Neutrophile count, cells/µL                 | 6100 (4500 – 9125)      |
| Lymphocyte count, cells/µL                  | 850 (500 -1200)         |
| Lymphocytes to Neutrophiles ratio           | 0.14 (0.08 – 0.29)      |
| Hemoglobin, g/dL                            | 13.8 (13.4 – 15.7)      |
| Platelet count, number x10 <sup>3</sup> /µL | 211.0 (176.0 – 262.5)   |
| AST, IU/L                                   | 59.0 (44.0 – 76.0)      |
| ALT, IU/L                                   | 46.0 (39.0 – 74.3)      |
| Albumin, g/dL                               | 3.7 (3.5 – 4.1)         |
| Creatinine, mg/dL                           | 1.1 (0.9 – 1.4)         |
| Azotemia, mg/dL                             | 48.0 (35.0 – 65.0)      |
| Ferritin, mg/L                              | 1354.0 (581.0 – 2545.5) |
| LDH, IU/L                                   | 467.5 (339.0 – 683.0)   |
| <b>Number of deaths</b>                     | 12/30 (40.0 %)          |

**Table S1. Characteristics of the studied patients.**

IQR: Interquartile range
